# Supplementary material for: Three mixed-ligand coordination networks modulated by flexible N-donor ligands: syntheses, topological structures, and temperature-sensitive luminescence properties
Source: Royal Society of Chemistry journal article supplement (doi:10.1039/c4ce01270d), 2014-07-14
Supplement: c4ce01270d1.pdf [file c4ce01270d1.pdf]

## Electronic Supplementary Information (ESI) for *CrystEngComm*

### **Three mixed-ligand coordination networks modulated by flexible N-donor ligands: Syntheses, topological structures, and temperature-sensitive luminescence properties**

**Zhi-Hao Yan<sup>a,b</sup>, Lu-Lu Han,<sup>a</sup> Ya-Qin Zhao,<sup>a</sup> Xiao-Yu Li,<sup>a</sup> Xing-Po Wang,<sup>a</sup> Lei Wang<sup>b</sup> and Di Sun,<sup>\*,a</sup>**

*<sup>a</sup>Key Lab of Colloid and Interface Chemistry, Ministry of Education, School of Chemistry and Chemical Engineering, Shandong University, Jinan, Shandong, 250100, China.*

*E-mail: dsun@sdu.edu.cn; Fax: +86-531-88364218.*

*<sup>b</sup>College of Chemistry and Molecular Engineering, Qingdao University of Science and Technology, Qingdao 266042, P. R. China.*

**(1) Fig. S1: The powder XRD patterns and the simulated one from the single-crystal diffraction data for compounds 1-3**

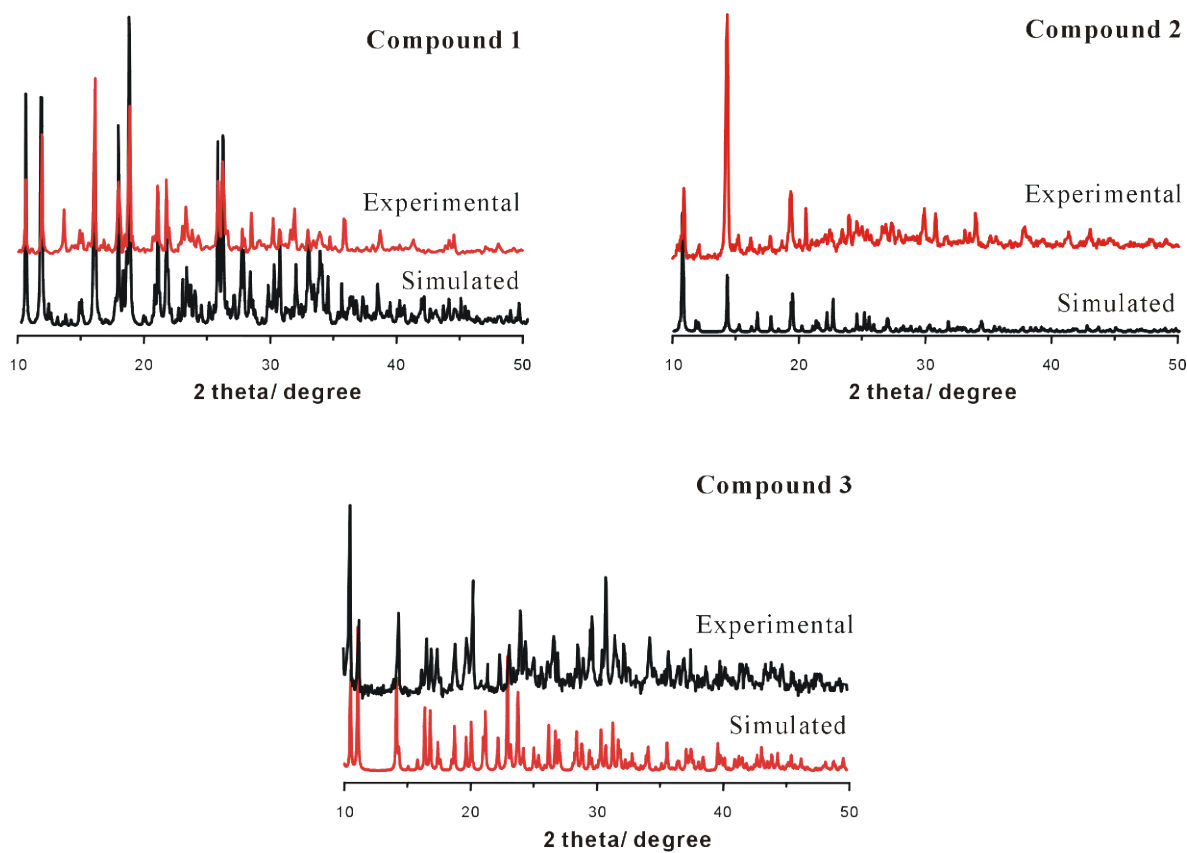

**(2) Fig. S2 IR spectrum of 1-3.**

Compound 1

Compound 2

Compound 3

**(3) Fig. S3: The infinite 1D zig-zag chain formed by Zn(II) cation centers and tbtpa ligands.**

(4) Fig. S4: TG curves of compounds 1-3

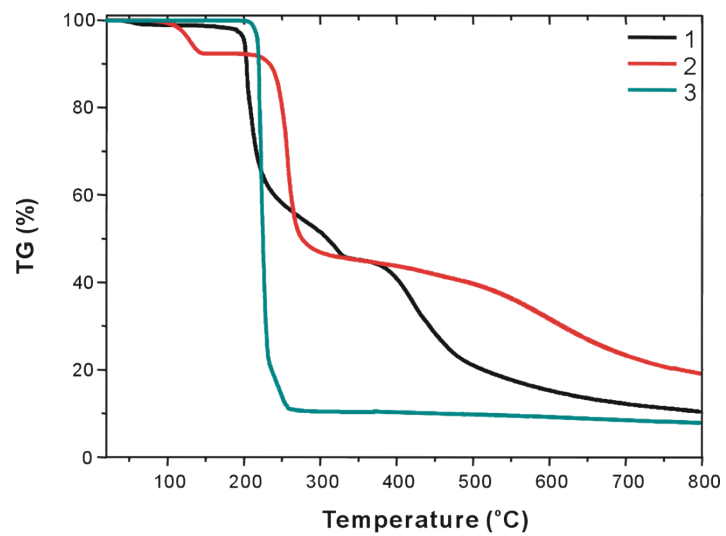

(5) Fig. S5: The emission decay curves for 2 and 3.

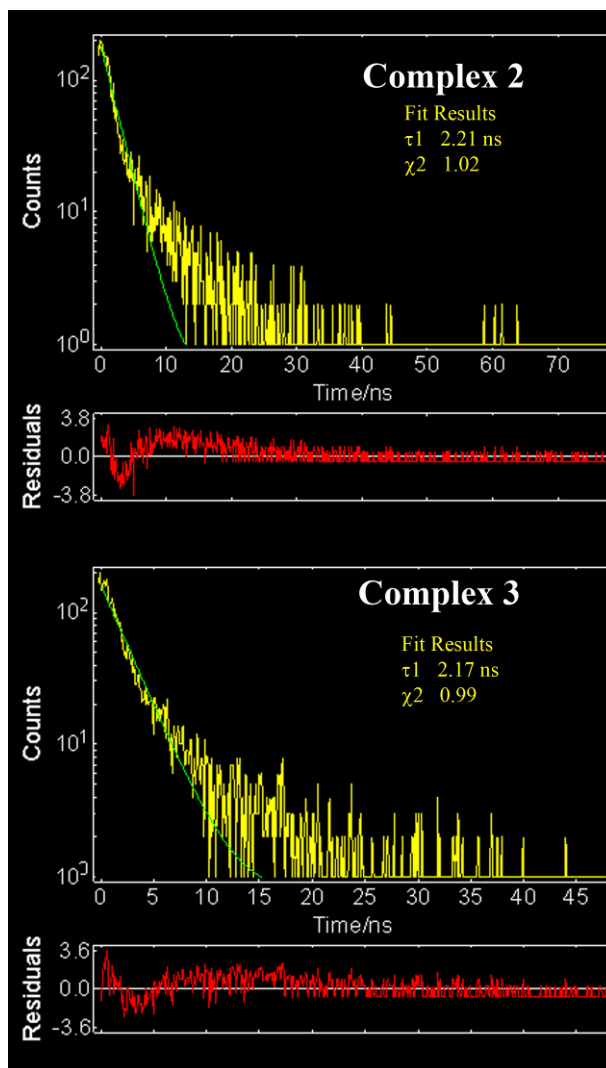

(6) Table S1: Summary of the synthesis of tbtpa-based coordination networks.

|                                                                                                                                                                         | Different N-donor ligands                                                           | Structures                                                                          | Literature/synthesis condition                                                                                                                                                                                                                                                                                                                                                                                                                                                                                                                                                                                                                                                                                                                                                                                                                                                                                                                                                                                                                                                                       |
|-------------------------------------------------------------------------------------------------------------------------------------------------------------------------|-------------------------------------------------------------------------------------|-------------------------------------------------------------------------------------|------------------------------------------------------------------------------------------------------------------------------------------------------------------------------------------------------------------------------------------------------------------------------------------------------------------------------------------------------------------------------------------------------------------------------------------------------------------------------------------------------------------------------------------------------------------------------------------------------------------------------------------------------------------------------------------------------------------------------------------------------------------------------------------------------------------------------------------------------------------------------------------------------------------------------------------------------------------------------------------------------------------------------------------------------------------------------------------------------|
| 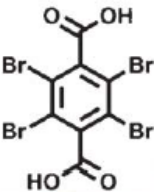<br> |    |   | <p><b>CrystEngComm, 2013, 15, 5552–5560.</b><br/>           Synthesis of <b>1</b>: A mixture of <math>\text{Cd}(\text{NO}_3)_2 \cdot 4\text{H}_2\text{O}</math> (123.4 mg, 0.4 mmol), tib (110.4 mg, 0.4 mmol) and <math>\text{H}_2\text{tbtpa}</math> (192.7 mg, 0.4 mmol), KOH (1.2 mg, 0.02 mmol) were dissolved in 10 mL methanol–<math>\text{H}_2\text{O}</math> (<math>v:v = 1 : 1</math>) in a 25 mL Teflon-lined stainless steel vessel. The mixture was sealed and heated at 120 °C for 72 min. After the mixture was cooled to room temperature. The pale yellow block crystals were collected.</p> <p>Synthesis of <b>2</b>: Synthesis of <b>2</b> was similar to that of <b>1</b>, but the ratio of <math>\text{Cd}(\text{NO}_3)_2 \cdot 4\text{H}_2\text{O}/\text{tib}/\text{H}_2\text{tbtpa}</math> is 1 : 1 : 2. Yellow crystals of <b>2</b> were obtained.</p> <p>Synthesis of <b>3</b>: Synthesis of <b>3</b> was similar to that of <b>1</b>, but the ratio of <math>\text{Cd}(\text{NO}_3)_2 \cdot 4\text{H}_2\text{O}/\text{tib}/\text{H}_2\text{tbtpa}</math> is 1 : 1 : 3.</p> |
|                                                                                                                                                                         |  |  | <p><b>CrystEngComm, 2012, 14, 7856–7860.</b><br/>           Synthesis of <b>2</b>: A mixture <math>\text{Zn}(\text{NO}_3)_2 \cdot 6\text{H}_2\text{O}</math> (5.9 mg, 0.02 mmol), bmimbp (3.42 mg, 0.01 mmol) and <math>\text{H}_2\text{tbtpa}</math> (14.5 mg, 0.03 mmol), NaOH (0.8 mg, 0.02 mmol) were dissolved in 1 mL DMF–<math>\text{H}_2\text{O}</math> (<math>v:v = 1:1</math>) and heated in a sealed Perex tube at 120 °C for 83 hours. After the mixture was cooled to room temperature. Pale-yellow crystals of <b>2</b> were obtained.</p>                                                                                                                                                                                                                                                                                                                                                                                                                                                                                                                                             |

|                                                                                    |                                                                                                                                                                                                                                                                                                                                                                                                                                                                                                                                                                                                                                                                                                                                                                                                                                                                                                                                                                                                                                                                                                                                                                                                                                                                                                                                                                                                                                                                                                                                                                                                                                                                                                                                                                                                                                                                                                                |                                                                                                                                                   |                                                                                                                                                                                                                                                                                                                                                                                                                                                                                               |
|------------------------------------------------------------------------------------|----------------------------------------------------------------------------------------------------------------------------------------------------------------------------------------------------------------------------------------------------------------------------------------------------------------------------------------------------------------------------------------------------------------------------------------------------------------------------------------------------------------------------------------------------------------------------------------------------------------------------------------------------------------------------------------------------------------------------------------------------------------------------------------------------------------------------------------------------------------------------------------------------------------------------------------------------------------------------------------------------------------------------------------------------------------------------------------------------------------------------------------------------------------------------------------------------------------------------------------------------------------------------------------------------------------------------------------------------------------------------------------------------------------------------------------------------------------------------------------------------------------------------------------------------------------------------------------------------------------------------------------------------------------------------------------------------------------------------------------------------------------------------------------------------------------------------------------------------------------------------------------------------------------|---------------------------------------------------------------------------------------------------------------------------------------------------|-----------------------------------------------------------------------------------------------------------------------------------------------------------------------------------------------------------------------------------------------------------------------------------------------------------------------------------------------------------------------------------------------------------------------------------------------------------------------------------------------|
|                                                                                    | 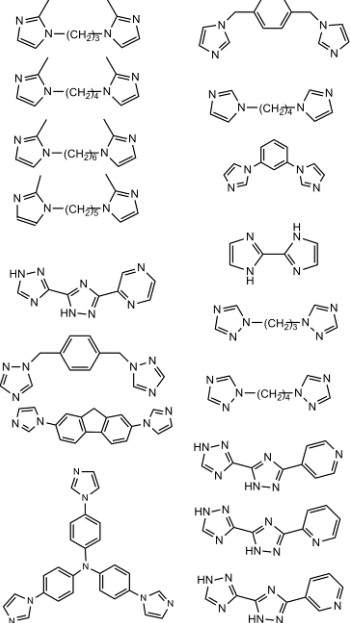                                                                                                                                                                                                                                                                                                                                                                                                                                                                                                                                                                                                                                                                                                                                                                                                                                                                                                                                                                                                                                                                                                                                                                                                                                                                                                                                                                                                                                                                                                                                                                                                                                                                                                                                                                                                                              | <p>Many synthetic conditions have been tried, but no crystalline products could be obtained yet.</p>                                              | <p>Synthesis method:<br/>In this system, not only the solvent systems have been changed, example DMSO-H<sub>2</sub>O (v:v = 1 : 1), NMP-H<sub>2</sub>O (v:v = 1 : 1), DMF-EtOH-H<sub>2</sub>O (v:v :v= 5 : 2 : 1), CH<sub>3</sub>CN-H<sub>2</sub>O (v:v = 2 : 1) and so on, but also different temperatures of the system have been tried, example 90 °C, 110 °C, 120 °C, 130 °C, 150 °C. Nevertheless, these experiments were all failed; we have not obtained any crystalline products.</p> |
|  |                                                                                                                                                                                                                                                                                                                                                                                                                                                                                                                                                                                                                                                                                                                                                                                                                                                                                                                                                                                                                                                                                                                                                                                                                                                                                                                                                                                                                                                                                                                                                                                                                                                                                                                                                                                                                               |  <p>3-fold interpenetration <b>dia</b> of class <b>IIIa</b></p> | <p><b>In this paper</b></p>                                                                                                                                                                                                                                                                                                                                                                                                                                                                   |
|                                                                                    |                                                                                                                                                                                                                                                                                                                                                                                                                                                                                                                                                                                                                                                                                                                                                                                                                                                                                                                                                                                                                                                                                                                                                                                                                                                                                                                                                                                                                                                                                                                                                                                                                                                                                                                                                                                                                             |  <p>2D-sql</p>                                                 |                                                                                                                                                                                                                                                                                                                                                                                                                                                                                               |
|                                                                                    |                                                                                                                                                                                                                                                                                                                                                                                                                                                                                                                                                                                                                                                                                                                                                                                                                                                                                                                                                                                                                                                                                                                                                                                                                                                                                                                                                                                                                                                                                                                                                                                                                                                                                                                                                                                                                             |  <p>2D-hcb</p>                                                 |                                                                                                                                                                                                                                                                                                                                                                                                                                                                                               |
| <p>Summary</p>                                                                     | <p>There are several coordination complexes that have been structurally characterized using H<sub>2</sub>tbtpa ligands with entangled features. In addition, a careful selection of N-donor ligands with different conformations as secondary auxiliary ligands is a key step for the rational design of structures with specific physical and chemical properties. In our previous report (<b>CrystEngComm</b>, 2013, 15, 5552 – 5560), we use the rigid ligand N-donor (tib) and H<sub>2</sub>tbtpa ligand to construct three new entangled coordination polymers [Cd(tib)(tbtpa)(H<sub>2</sub>O)]<sub>n</sub> (1) and [Cd(Htib)(tbtpa)·Htbtpa·2CH<sub>3</sub>OH]<sub>n</sub> (2) and [Cd<sub>2</sub>(tib)<sub>2</sub>(tbtpa)<sub>2</sub>(H<sub>2</sub>O)·10H<sub>2</sub>O]<sub>n</sub> (3) by adjusting the molar ratio of the reactant metal salt and ligands. Complex 1 is a 2-fold interpenetrated three-dimensional (3D) 8-connected uninodal net with rare <b>hex</b> topology. Complex 2 presents a 2D 6<sup>3</sup>-<b>hcb</b> network, which is interdigitated with each other to form the 3D supramolecular framework. Complex 3 is a complicated 3D self-penetrated framework, which can be seen as a pair of 2-fold interpenetrated networks by breaking bidentate-bridging tib ligand.</p> <p>In another paper (<b>CrystEngComm</b>, 2012, 14, 7856–7860), when the semi-rigid bmimbp ligand was introduced instead of the rigid tib ligand. A novel entangled coordination polymers namely [Zn(bmimbp)(tbtpa)]<sub>n</sub> (bmimbp= 4,4'-bis(2-methylimidazol-1-ylmethyl)biphenyl) was synthesized, and the most striking feature of the complex is that two identical 2D single 6<sup>3</sup>-<b>hcb</b> sheets are interlocked with each other in a 2D → 2D parallel fashion thus directly leading to the formation of a 2D polyrotaxane-like structure containing rotaxane-like motifs.</p> |                                                                                                                                                   |                                                                                                                                                                                                                                                                                                                                                                                                                                                                                               |



|  |                                                                                                                                                                                                                                                                                                                                                                                                                                                                                                                                                                                                                                                                             |
|--|-----------------------------------------------------------------------------------------------------------------------------------------------------------------------------------------------------------------------------------------------------------------------------------------------------------------------------------------------------------------------------------------------------------------------------------------------------------------------------------------------------------------------------------------------------------------------------------------------------------------------------------------------------------------------------|
|  | <p>In this assembly system, previous work mainly focused on rigid or semi-rigid N-donor ligands, whereas flexible ligands have been rarely explored. In order to explore the influence of flexible N-donor ligands on the tuning of entangled networks and achieve different topological structures, here we have adopted three such flexible N-donor ligands viewing their difference of length and configuration and influence on the final structures. In addition, as shown in above table, several other N-donor ligands were also selected in this system, but no crystalline products could be obtained yet, although many synthetic conditions have been tried.</p> |
|--|-----------------------------------------------------------------------------------------------------------------------------------------------------------------------------------------------------------------------------------------------------------------------------------------------------------------------------------------------------------------------------------------------------------------------------------------------------------------------------------------------------------------------------------------------------------------------------------------------------------------------------------------------------------------------------|
